# Supplementary material
Source: publisher figshare collection journal article supplement (https://karger.figshare.com/ndownloader/files/15563138)
Supplement: Supplementary file 1 [file 15563138]

**Supplementary Material**

Supplementary Fig. 1. Case of bone metastasis in T spine treated with radiotherapy (A) in a typical field (including upper/lower level of the involved lesions) and (B) in a reduced field (including only the involved lesions).
